# Supplementary material
Source: PubMed Central journal article supplement (PMC4824179)
Supplement: NIHMS638575-supplement-06.pdf [file NIHMS638575-supplement-06.pdf]

## Appendix

Supplementary Table I. Patient comorbidities

| Comorbidity                     | 1999*          | 2000           | 2004           | 2005           | 2009           | 2010           |
|---------------------------------|----------------|----------------|----------------|----------------|----------------|----------------|
| Congestive heart failure, n (%) | 29,886 (15.7)  | 32,256 (16.3)  | 33,910 (16.3)  | 32,458 (16.2)  | 26,009 (15.3)  | 25,610 (15.1)  |
| Myocardial infarction, n (%)    | 9045 (4.7)     | 9785 (4.9)     | 10,711 (5.2)   | 9887 (4.9)     | 8626 (5.1)     | 8555 (5.0)     |
| Unstable angina, n (%)          | 12,361 (6.5)   | 12,139 (6.1)   | 9504 (4.6)     | 8420 (4.2)     | 5707 (3.4)     | 5272 (3.1)     |
| Atrial fibrillation, n (%)      | 14,365 (7.5)   | 15,610 (7.9)   | 17,266 (8.3)   | 17,152 (8.6)   | 14,159 (8.3)   | 13,922 (8.2)   |
| DVT/PE, n (%)                   | 602 (0.3)      | 637 (0.3)      | 837 (0.4)      | 835 (0.4)      | 866 (0.5)      | 885 (0.5)      |
| Mitral valve prolapse, n (%)    | 2701 (1.4)     | 2870 (1.5)     | 3329 (1.6)     | 3132 (1.6)     | 3307 (2.0)     | 3442 (2.0)     |
| Atherosclerosis, n (%)          | 130,343 (68.3) | 138,158 (69.8) | 152,343 (73.4) | 147,186 (73.6) | 125,652 (74.0) | 125,929 (74.1) |
| Respiratory failure, n (%)      | 4798 (2.5)     | 5333 (2.7)     | 6029 (2.9)     | 6049 (3.0)     | 8126 (4.8)     | 8466 (5.0)     |
| Hypertension, n (%)             | 101,361 (53.1) | 108,999 (55.1) | 124,539 (60.0) | 120,195 (60.1) | 112,716 (66.4) | 113,563 (66.9) |
| Stroke, n (%)                   | 4111 (2.2)     | 4264 (2.2)     | 4022 (1.9)     | 3827 (1.9)     | 3092 (1.8)     | 3139 (1.8)     |
| Cerebrovascular disease, n (%)  | 10,887 (5.7)   | 11,274 (5.7)   | 10,112 (4.9)   | 9365 (4.7)     | 7366 (4.3)     | 7021 (4.1)     |
| Renal failure, n (%)            | 8049 (4.2)     | 9335 (4.7)     | 13,988 (6.7)   | 14,767 (7.4)   | 21,803 (12.8)  | 22,986 (13.5)  |
| COPD, n (%)                     | 43,034 (22.6)  | 45,198 (22.8)  | 50,645 (24.4)  | 50,266 (25.1)  | 34,458 (20.3)  | 34,332 (20.2)  |
| Pneumonia, n (%)                | 22,838 (12.0)  | 25,050 (12.7)  | 29,297 (14.1)  | 29,682 (14.8)  | 26,355 (15.5)  | 25,312 (14.9)  |
| Malnutrition, n (%)             | 4221 (2.2)     | 4401 (2.2)     | 5812 (2.8)     | 5957 (3.0)     | 7954 (4.7)     | 8248 (4.9)     |
| Dementia, n (%)                 | 16,956 (8.9)   | 18,643 (9.4)   | 22,203 (10.7)  | 21,621 (10.8)  | 19,131 (11.3)  | 19,134 (11.3)  |
| Functional disability, n (%)    | 4958 (2.6)     | 5314 (2.7)     | 5230 (2.5)     | 4702 (2.3)     | 4441 (2.6)     | 4319 (2.5)     |
| PVD, n (%)                      | 11,850 (6.2)   | 12,900 (6.5)   | 14,589 (7.0)   | 14,175 (7.1)   | 12,152 (7.2)   | 11,381 (6.7)   |
| Cancer, n (%)                   | 11,668 (6.1)   | 12,341 (6.2)   | 13,467 (6.5)   | 13,095 (6.5)   | 11,279 (6.6)   | 11,103 (6.5)   |
| Trauma, n (%)                   | 9650 (5.1)     | 10,370 (5.2)   | 12,928 (6.2)   | 12,631 (6.3)   | 10,420 (6.1)   | 9905 (5.8)     |
| Psychiatric disease, n (%)      | 3660 (1.9)     | 3783 (1.9)     | 3947 (1.9)     | 3615 (1.8)     | 3536 (2.1)     | 3569 (2.1)     |
| Liver disease, n (%)            | 900 (0.5)      | 993 (0.5)      | 1293 (0.6)     | 1266 (0.6)     | 1093 (0.6)     | 1144 (0.7)     |
| Depression, n (%)               | 7907 (4.1)     | 9229 (4.7)     | 11,600 (5.6)   | 11,046 (5.5)   | 9324 (5.5)     | 9172 (5.4)     |
| Diabetes, n (%)                 | 58,200 (30.5)  | 60,679 (30.7)  | 65,700 (31.6)  | 63,495 (31.7)  | 53,930 (31.8)  | 54,486 (32.1)  |

COPD = chronic obstructive pulmonary disease; DVT/PE = deep vein thrombosis/pulmonary embolism; PVD = peripheral vascular disease.

\* For display purposes, we report data from 1999, 2000, 2004, 2005, 2009, and 2010.

**Supplementary Table II.** Risk-adjusted annual trends for ischemic stroke after AMI by subgroups

| Hazard ratio | 95%<br>Confidence<br>interval |       | Subgroup                    |
|--------------|-------------------------------|-------|-----------------------------|
| 0.977        | 0.972                         | 0.982 | Treatment: PCI only         |
| 0.985        | 0.977                         | 0.994 | Treatment: CABG only        |
| 0.995        | 0.966                         | 1.026 | Treatment: PCI and CABG     |
| 0.976        | 0.973                         | 0.979 | Treatment: non-reperfusion  |
| 0.970        | 0.966                         | 0.974 | Race-sex: White male        |
| 0.976        | 0.973                         | 0.980 | Race-sex: White female      |
| 0.979        | 0.966                         | 0.991 | Race-sex: Black male        |
| 0.979        | 0.969                         | 0.989 | Race-sex: Black female      |
| 0.953        | 0.937                         | 0.970 | Race-sex: other race male   |
| 0.972        | 0.957                         | 0.988 | Race-Sex: other race female |
| 0.975        | 0.971                         | 0.980 | Age (yrs): 65-74            |
| 0.971        | 0.967                         | 0.975 | Age (yrs): 75-84            |
| 0.977        | 0.972                         | 0.981 | Age (yrs): ≥85              |

CABG = coronary artery bypass graft surgery; PCI = percutaneous coronary intervention

**Supplementary Table III.** Risk-adjusted annual trends for hemorrhagic stroke after AMI by subgroups

| Hazard ratio | 95%<br>Confidence<br>interval |       | Subgroup                    |
|--------------|-------------------------------|-------|-----------------------------|
| 1.014        | 0.997                         | 1.032 | Treatment: PCI only         |
| 1.013        | 0.982                         | 1.046 | Treatment: CABG only        |
| 0.998        | 0.888                         | 1.122 | Treatment: PCI and CABG     |
| 1.001        | 0.990                         | 1.011 | Treatment: non-reperfusion  |
| 1.003        | 0.989                         | 1.017 | Race-sex: White male        |
| 0.991        | 0.978                         | 1.003 | Race-sex: White female      |
| 1.027        | 0.982                         | 1.074 | Race-sex: Black male        |
| 1.034        | 0.999                         | 1.069 | Race-sex: Black female      |
| 1.014        | 0.964                         | 1.067 | Race-sex: other race male   |
| 1.047        | 0.998                         | 1.099 | Race-sex: other race female |
| 1.012        | 0.997                         | 1.028 | Age (yrs): 65-74            |
| 0.994        | 0.981                         | 1.007 | Age (yrs): 75-84            |
| 1.008        | 0.991                         | 1.025 | Age (yrs): ≥85              |

CABG = coronary artery bypass graft surgery; PCI = percutaneous coronary intervention.

**Supplementary Table IV.** Thirty-day and 1-year mortality rates for ischemic stroke after AMI

|                                      | 1999*            | 2000             | 2004             | 2005             | 2009             | 2010             |
|--------------------------------------|------------------|------------------|------------------|------------------|------------------|------------------|
| Total                                | 5528             | 5721             | 5073             | 4717             | 3905             | 3803             |
| Thirty-day ischemic stroke mortality |                  |                  |                  |                  |                  |                  |
| Deaths                               | 1100             | 1144             | 959              | 958              | 742              | 696              |
| Overall mortality                    | 19.9 (18.8-20.9) | 20.0 (19.0-21.1) | 18.9 (17.9-20.0) | 20.3 (19.1-21.4) | 19.0 (17.8-20.2) | 18.3 (17.1-19.6) |
| By age group (yrs)                   |                  |                  |                  |                  |                  |                  |
| 65-74                                | 13.1 (11.5-14.8) | 12.5 (11.0-14.2) | 10.5 (9.10-12.2) | 11.7 (10.1-13.5) | 9.7 (8.15-11.5)  | 9.8 (8.27-11.6)  |
| 75-84                                | 16.9 (15.4-18.5) | 19.3 (17.8-20.9) | 17.5 (15.9-19.2) | 18.3 (16.7-20.1) | 16.2 (14.3-18.2) | 14.8 (12.9-16.7) |
| ≥85                                  | 33.1 (30.7-35.7) | 30.1 (27.7-32.5) | 31.9 (29.3-34.5) | 33.4 (30.8-36.1) | 33.3 (30.6-36.1) | 33.3 (30.5-36.2) |
| By race-sex group                    |                  |                  |                  |                  |                  |                  |
| White female                         | 23.3 (21.7-25.0) | 22.5 (21.0-24.2) | 23.5 (21.7-25.3) | 23.5 (21.7-25.4) | 22.9 (20.9-24.9) | 21.1 (19.2-23.1) |
| White male                           | 15.4 (14.0-17.0) | 17.2 (15.7-18.8) | 14.4 (12.9-16.0) | 16.3 (14.7-18.0) | 16.8 (15.0-18.8) | 15.4 (13.6-17.2) |
| Black female                         | 20.7 (16.5-25.5) | 20.6 (16.5-25.1) | 21.1 (17.0-25.8) | 22.0 (17.7-26.8) | 16.0 (11.7-21.1) | 19.5 (14.7-25.1) |
| Black male                           | 23.4 (17.3-30.5) | 24.1 (18.1-30.8) | 13.2 (8.81-18.7) | 20.5 (14.3-28.0) | 10.5 (6.23-16.3) | 15.5 (10.1-22.4) |
| Other race female                    | 21.6 (15.0-29.6) | 19.5 (12.9-27.6) | 14.6 (9.61-21.0) | 22.1 (14.6-31.3) | 13.2 (7.56-20.8) | 15.9 (8.72-25.6) |
| Other race male                      | 19.0 (12.0-27.9) | 11.8 (6.45-19.4) | 21.0 (14.2-29.2) | 19.2 (12.0-28.3) | 11.7 (5.99-20.0) | 22.2 (13.3-33.6) |
| By history of revascularization      |                  |                  |                  |                  |                  |                  |
| PCI                                  | 11.1 (9.2-13.2)  | 9.6 (7.8-11.5)   | 9.2 (7.8-10.9)   | 10.9 (9.3-12.7)  | 10.2 (8.6-12.0)  | 10.2 (8.6-11.9)  |
| CABG                                 | 7.0 (4.9-9.7)    | 8.3 (6.10-11.1)  | 5.1 (3.31-7.5)   | 8.1 (5.64-11.1)  | 6.3 (3.86-9.5)   | 6.1 (3.7-9.3)    |
| Both PCI and CABG                    | 2.8 (0.1-14.5)   | 6.5 (0.8-21.4)   | 9.5 (2.7-22.6)   | 14.3 (4.0-32.7)  | 5.4 (0.7-18.2)   | 9.1 (1.9-24.3)   |
| Non-reperfusion                      | 23.6 (22.3-25.0) | 24.2 (22.9-25.5) | 25.5 (24.0-27.0) | 26.3 (24.7-27.9) | 25.8 (24.0-27.7) | 25.2 (23.4-27.1) |
| One-year ischemic stroke mortality   |                  |                  |                  |                  |                  |                  |
| Deaths                               | 2090             | 2197             | 1867             | 1778             | 1382             | 1342             |
| Overall mortality                    | 37.8 (36.5-39.1) | 38.4 (37.2-39.7) | 36.8 (35.5-38.2) | 37.7 (36.3-39.1) | 35.4 (33.9-36.9) | 35.3 (33.8-36.8) |
| By age group                         |                  |                  |                  |                  |                  |                  |
| 65-74                                | 26.0 (23.9-28.1) | 25.2 (23.1-27.3) | 25.2 (23.1-27.4) | 24.7 (22.5-27.0) | 22.7 (20.5-25.1) | 22.6 (20.4-25.0) |
| 75-84                                | 34.8 (32.9-36.8) | 38.0 (36.2-40.0) | 34.7 (32.7-36.8) | 35.3 (33.2-37.5) | 31.7 (29.4-34.2) | 30.3 (27.9-32.8) |
| ≥85                                  | 57.2 (54.6-59.8) | 54.5 (51.9-57.1) | 54.9 (52.2-57.7) | 56.7 (53.9-59.5) | 54.7 (51.8-57.7) | 57.2 (54.2-60.2) |
| By race-sex group                    |                  |                  |                  |                  |                  |                  |
| White female                         | 41.2 (39.3-43.1) | 41.3 (39.4-43.2) | 40.6 (38.5-42.7) | 41.8 (39.7-43.9) | 39.1 (36.8-41.4) | 38.6 (36.3-41.0) |
| White male                           | 32.1 (30.1-34.0) | 33.4 (31.5-35.4) | 30.7 (28.7-32.8) | 31.3 (29.2-33.4) | 31.0 (28.7-33.4) | 30.3 (28.0-32.7) |
| Black female                         | 45.1 (39.7-50.7) | 47.2 (42.0-52.5) | 48.3 (42.9-53.7) | 46.9 (41.5-52.4) | 39.8 (33.8-46.1) | 40.2 (34.0-46.7) |
| Black male                           | 47.4 (39.7-55.1) | 41.7 (34.6-49.1) | 39.1 (32.2-46.3) | 43.8 (35.6-52.3) | 34.6 (27.3-42.4) | 38.5 (30.6-46.9) |
| Other race female                    | 42.5 (34.0-51.4) | 45.5 (36.5-54.8) | 34.1 (26.9-42.0) | 42.3 (32.7-52.4) | 38.6 (29.6-48.2) | 37.8 (27.3-49.2) |
| Other race male                      | 33.3 (24.4-43.2) | 30.0 (21.6-39.5) | 37.1 (28.6-46.2) | 31.3 (22.4-41.4) | 23.4 (15.3-33.3) | 37.5 (26.4-49.7) |
| By history of revascularization      |                  |                  |                  |                  |                  |                  |
| PCI                                  | 22.0 (19.4-24.8) | 20.5 (18.1-23.1) | 21.7 (19.6-24.0) | 22.1 (19.9-24.4) | 21.9 (19.7-24.3) | 20.9 (18.7-23.2) |
| CABG                                 | 14.8 (11.8-18.3) | 17.2 (14.1-20.8) | 14.5 (11.4-18.0) | 15.9 (12.5-19.7) | 12.5 (9.08-16.6) | 12.7 (9.26-16.9) |
| Both PCI and CABG                    | 5.6 (0.68-18.7)  | 12.9 (3.63-29.8) | 14.3 (5.43-28.5) | 21.4 (8.30-41.0) | 13.5 (4.54-28.8) | 15.2 (5.11-31.9) |
| Non-reperfusion                      | 44.6 (43.0-46.1) | 45.7 (44.2-47.2) | 47.2 (45.5-49.0) | 48.1 (46.3-49.9) | 46.4 (44.3-48.5) | 47.7 (45.5-49.8) |

CABG = coronary artery bypass graft surgery; PCI = percutaneous coronary intervention.

\*For display purposes, we report data from 1999, 2000, 2004, 2005, 2009, and 2010. Total = total hospitalizations for ischemic stroke after AMI.

**Supplementary Table V.** Thirty-day and 1-year mortality rates for hemorrhagic stroke after AMI

|                                                | 1999*            | 2000             | 2004             | 2005             | 2009             | 2010             |
|------------------------------------------------|------------------|------------------|------------------|------------------|------------------|------------------|
| <b>Total</b>                                   | 356              | 400              | 451              | 435              | 423              | 335              |
| <b>Thirty-day hemorrhagic stroke mortality</b> |                  |                  |                  |                  |                  |                  |
| Deaths                                         | 172              | 212              | 241              | 212              | 202              | 153              |
| Overall mortality                              | 48.3 (43.0-53.6) | 53.0 (48.0-58.0) | 53.4 (48.7-58.1) | 48.7 (44.0-53.5) | 47.8 (42.9-52.6) | 45.7 (40.3-51.2) |
| By age group                                   |                  |                  |                  |                  |                  |                  |
| 65-74                                          | 41.8 (31.5-52.6) | 46.5 (37.1-56.1) | 44.9 (36.1-54.0) | 46.5 (38.2-55.0) | 45.7 (36.8-54.7) | 41.0 (32.2-50.3) |
| 75-84                                          | 48.3 (40.8-55.9) | 50.5 (43.1-57.9) | 55.5 (48.3-62.5) | 46.6 (39.0-54.3) | 46.8 (39.5-54.2) | 40.5 (31.5-50.0) |
| ≥85                                            | 55.3 (44.1-66.1) | 65.0 (54.8-74.3) | 58.9 (49.7-67.6) | 54.7 (45.2-63.9) | 51.9 (42.0-61.6) | 57.7 (47.3-67.7) |
| By race-sex group                              |                  |                  |                  |                  |                  |                  |
| White female                                   | 48.1 (40.7-55.6) | 52.9 (45.5-60.1) | 58.1 (51.2-64.7) | 52.2 (45.2-59.1) | 51.3 (44.0-58.6) | 52.4 (43.9-60.9) |
| White male                                     | 53.1 (44.1-61.9) | 53.9 (45.7-62.1) | 49.7 (41.9-57.5) | 46.4 (38.6-54.3) | 46.3 (38.4-54.3) | 40.2 (31.6-49.2) |
| Black female                                   | 38.9 (17.3-64.3) | 54.5 (32.2-75.6) | 43.5 (23.2-65.5) | 46.7 (28.3-65.7) | 33.3 (18.0-51.8) | 40.0 (21.1-61.3) |
| Black male                                     | 30.0 (6.7-65.3)  | 46.2 (19.2-74.9) | 37.5 (15.2-64.6) | 42.9 (17.7-71.1) | 28.6 (8.4-58.1)  | 21.4 (4.7-50.8)  |
| Other race female                              | 25.0 (0.6-80.6)  | 38.5 (13.9-68.4) | 63.2 (38.4-83.7) | 25.0 (0.6-80.6)  | 50.0 (21.1-78.9) | 75.0 (42.8-94.5) |
| Other race male                                | 36.4 (10.9-69.2) | 66.7 (29.9-92.5) | 42.9 (9.9-81.6)  | 41.7 (15.2-72.3) | 66.7 (38.4-88.2) | 35.7 (12.8-64.9) |
| By history of revascularization                |                  |                  |                  |                  |                  |                  |
| PCI                                            | 39.1 (25.1-54.6) | 51.9 (37.8-65.7) | 59.5 (50.4-68.2) | 47.8 (39.3-56.5) | 46.2 (37.5-55.1) | 39.8 (30.7-49.5) |
| CABG                                           | 34.6 (17.2-55.7) | 41.0 (25.6-57.9) | 30.6 (16.4-48.1) | 40.7 (22.4-61.2) | 29.0 (14.2-48.0) | 25.0 (10.7-44.9) |
| Both PCI and CABG                              | 0.0 (0.0-84.2)   | 33.3 (0.8-90.6)  | NA               | 50.0 (6.8-93.2)  | 100 (15.8-0.0)   | 50.0 (1.3-98.7)  |
| Non-reperfusion                                | 51.4 (45.4-57.4) | 54.9 (49.2-60.6) | 53.6 (47.7-59.5) | 50.0 (43.8-56.2) | 50.4 (44.1-56.7) | 52.1 (44.8-59.3) |
| <b>One-year hemorrhagic stroke mortality</b>   |                  |                  |                  |                  |                  |                  |
| Deaths                                         | 23,710           | 27,000           | 29,901           | 27,884           | 26,311           | 20,301           |
| Overall mortality                              | 66.6 (61.4-71.5) | 67.5 (62.7-72.1) | 66.3 (61.7-70.7) | 64.1 (59.4-68.7) | 62.2 (57.4-66.8) | 60.6 (55.1-65.9) |
| By age group                                   |                  |                  |                  |                  |                  |                  |
| 65-74                                          | 57.1 (46.3-67.5) | 64.0 (54.5-72.8) | 52.8 (43.7-61.7) | 59.0 (50.5-67.1) | 55.1 (46.0-64.0) | 50.0 (40.8-59.2) |
| 75-84                                          | 67.2 (59.9-74.0) | 66.1 (58.8-72.9) | 71.0 (64.2-77.2) | 63.8 (56.2-70.9) | 60.1 (52.7-67.2) | 58.6 (49.1-67.7) |
| ≥85                                            | 75.3 (64.8-84.0) | 74.0 (64.3-82.3) | 72.6 (63.9-80.2) | 70.9 (61.8-79.0) | 74.1 (64.8-82.0) | 76.3 (66.6-84.3) |
| By race-sex group                              |                  |                  |                  |                  |                  |                  |
| White female                                   | 63.4 (56.0-70.4) | 67.0 (59.9-73.6) | 68.7 (62.0-74.8) | 67.5 (60.7-73.8) | 62.4 (55.1-69.4) | 67.1 (58.8-74.8) |
| White male                                     | 70.8 (62.2-78.4) | 67.1 (59.0-74.5) | 63.9 (56.2-71.1) | 61.4 (53.6-68.9) | 61.3 (53.2-68.8) | 55.1 (46.0-64.0) |
| Black female                                   | 83.3 (58.6-96.4) | 77.3 (54.6-92.2) | 60.9 (38.5-80.3) | 66.7 (47.2-82.7) | 45.5 (28.1-63.7) | 60.0 (38.7-78.9) |
| Black male                                     | 70.0 (34.8-93.3) | 53.8 (25.1-80.8) | 56.3 (29.9-80.3) | 64.3 (35.1-87.2) | 64.3 (35.1-87.2) | 42.9 (17.7-71.1) |
| Other race female                              | 50.0 (6.8-93.2)  | 69.2 (38.6-90.9) | 78.9 (54.4-94.0) | 25.0 (0.63-80.6) | 75.0 (42.8-94.5) | 75.0 (42.8-94.5) |
| Other race male                                | 45.5 (16.8-76.6) | 77.8 (40.0-97.2) | 57.1 (18.4-90.1) | 50.0 (21.1-78.9) | 93.3 (68.1-99.8) | 50.0 (23.0-77.0) |
| By history of revascularization                |                  |                  |                  |                  |                  |                  |
| PCI                                            | 56.5 (41.1-71.1) | 59.3 (45.0-72.4) | 71.4 (62.7-79.1) | 58.7 (50.0-67.0) | 58.3 (49.4-66.9) | 51.3 (41.7-60.8) |
| CABG                                           | 38.5 (20.2-59.4) | 53.8 (37.2-69.9) | 44.4 (27.9-61.9) | 55.6 (35.3-74.5) | 41.9 (24.6-60.9) | 35.7 (18.6-55.9) |
| Both PCI and CABG                              | 0.0 (0.0-84.2)   | 33.3 (0.8-90.6)  | NA               | 75.0 (19.4-99.4) | 100 (15.8-0.0)   | 50.0 (1.3-98.7)  |
| Non-reperfusion                                | 71.3 (65.6-76.5) | 71.1 (65.6-76.1) | 66.8 (61.0-72.2) | 67.7 (61.7-73.3) | 66.3 (60.2-72.0) | 69.8 (62.8-76.2) |

Total= total hospitalizations for hemorrhagic stroke after AMI.

AMI=acute myocardial infarction; CABG=coronary artery bypass graft surgery; PCI=percutaneous coronary intervention

\*For display purposes, we report data from 1999, 2000, 2004, 2005, 2009, and 2010.
